# Supplementary material for: Flexible and multifunctional composite films based on rare earth phosphors as broadband thermal emitters for high-performance passive radiative cooling
Source: Royal Society of Chemistry journal article supplement (doi:10.1039/d3tc04367c), 2024-01-01
Supplement: d3tc04367c1.pdf [file d3tc04367c1.pdf]

## Supplementary Information for

# Flexible and Multifunctional Composite Films Based on Rare Earth Phosphors as Broadband Thermal Emitters for High-Performance Passive Radiative Cooling

Ruiming Tan,<sup>a</sup> Wangyang Hu,<sup>b</sup> Xin Yao,<sup>a\*</sup> Nan Lin,<sup>b</sup> Peng Xue,<sup>c</sup> Shiqing Xu,<sup>a\*</sup> and Gongxun Bai<sup>b\*</sup>

<sup>a</sup> College of Optical and Electronic Technology, China Jiliang University, Hangzhou 310018, China.

<sup>b</sup> Key Laboratory of Rare Earth Optoelectronic Materials and Devices of Zhejiang Province, China Jiliang University, Hangzhou 310018, China.

<sup>c</sup> Beijing Key Laboratory of Green Building Environment and Energy Saving Technology, Beijing University of Technology, Beijing 100124, China.

### \*Corresponding Author

Email address: baigx@cjlu.edu.cn (G Bai), yaoxin\_nk@126.com (X Yao), shiqingxu@cjlu.edu.cn (S Xu)

## Supplementary Text:

### Calculation of the cooling power intensity

In the following equation (1),  $P_{\text{rad}}(T)$  is the power radiated outward by the radiator,  $P_{\text{atm}}$  is the atmospheric longwave radiation power absorbed by the radiator, and  $P_{\text{solar}}$  is the absorbed solar irradiance.  $P_{\text{nonrad}}$  refers to the non-radiative heat transfer power between the radiator and the surrounding environment, that is, conduction and convection.

$$P_{\text{cooling}}(T) = P_{\text{rad}}(T) - P_{\text{solar}} - P_{\text{atm}} - P_{\text{nonrad}} \quad (1)$$

Among them,  $D_{\text{abs}}$  is the absorption spectrum of the device,  $A_{\text{atm}}$  is the downward long-wave radiation flux spectrum of the atmosphere,  $I_{\text{solar}}$  is the solar spectrum, and the  $I_{\text{bb}}$  is the radiation power spectrum of the black-body at  $T$ . The  $h$  is the non-radiative heat transfer coefficient between the device and the surrounding environment, the  $T$  and  $T_{\text{amb}}$  are the device temperature, ambient air temperature, respectively.

These individual calculations are given by the following equations:<sup>[1,2]</sup>

$$P_{\text{atm}} = \int D_{\text{RC}}(\lambda) A_{\text{atm}}(\lambda) \quad (2)$$

$$P_{\text{solar}} = \int D_{\text{RC}}(\lambda) I_{\text{sun}}(\lambda) \quad (3)$$

$$P_{\text{rad}} = \int D_{\text{RC}}(\lambda) I_{\text{bb}}(\lambda) \quad (4)$$

$$P_{\text{nonrad}} = h(T - T_{\text{amb}}) \quad (5)$$

Among them,  $D_{\text{RC}}$  is the absorption spectrum of the device,  $A_{\text{atm}}$  is the downward long-wave radiation flux spectrum of the atmosphere,  $I_{\text{sun}}$  is the solar spectrum, and the  $I_{\text{bb}} = \frac{2hc^2}{\lambda^5 (e^{\frac{hc}{\lambda kT}} - 1)}$  is the radiation power spectrum of the black-body at  $T$ . The  $h$  is the

non-radiative heat transfer coefficient between the device and the surrounding environment, the  $T$  and  $T_{\text{amb}}$  are the device temperature, ambient air temperature, respectively.

### Calculation of the average solar reflectivity and thermal emissivity

The solar reflectance ( $R_{\text{solar}}$ ) and mid-infrared band thermal emissivity ( $\epsilon_{\text{IR}}$ ). The selective longwave infrared (LWIR) emittance ( $\epsilon_{\text{LWIR}}$ ) measured by experiment, their

average value can be calculated by the following equations:<sup>[3]</sup>

$$\bar{\mathbf{R}}_{\text{Solar}} = \frac{\int_{0.3 \mu\text{m}}^{2.5 \mu\text{m}} I_{\text{AM1.5}}(\lambda) R(\lambda) d(\lambda)}{\int_{0.3 \mu\text{m}}^{2.5 \mu\text{m}} I_{\text{AM1.5}}(\lambda) d(\lambda)} \quad (6)$$

And

$$\bar{\mathbf{E}}_{\text{IR}} = \frac{\int_{2.5 \mu\text{m}}^{25 \mu\text{m}} I_{\text{bb}}(\lambda, T) \varepsilon(\lambda) d(\lambda)}{\int_{2.5 \mu\text{m}}^{25 \mu\text{m}} I_{\text{bb}}(\lambda, T) d(\lambda)} \quad (7)$$

$$\bar{\mathbf{E}}_{\text{LWIR}} = \frac{\int_{8 \mu\text{m}}^{13 \mu\text{m}} I_{\text{bb}}(\lambda, T) \varepsilon(\lambda) d(\lambda)}{\int_{8 \mu\text{m}}^{13 \mu\text{m}} I_{\text{bb}}(\lambda, T) d(\lambda)} \quad (8)$$

The  $I_{\text{AM1.5}}(\lambda)$  is the AM 1.5 global standard solar intensity and  $R(\lambda)$  is the solar reflectivity of radiative cooler at wavelength  $\lambda$ .  $I_{\text{bb}}(\lambda, T)$  is the radiation of a blackbody at a temperature of T and a wavelength of  $\lambda$ .

## Supplementary Figures:

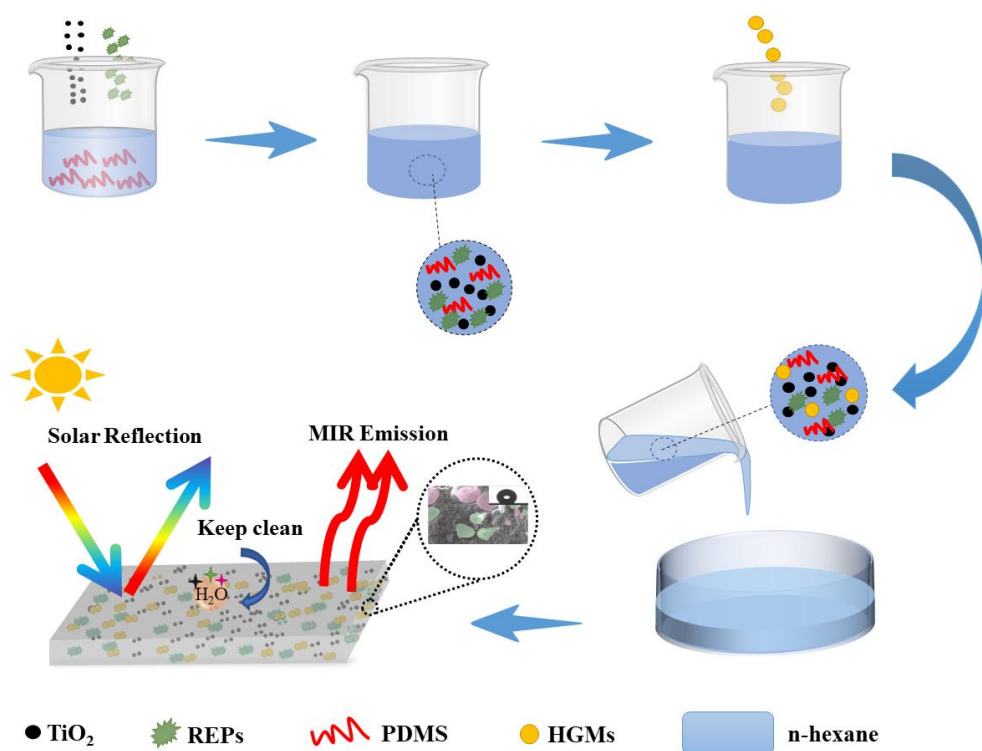

**Fig. S1** Diagram of the fabrication process of the SA film and white film by stirring, mixing and drying.

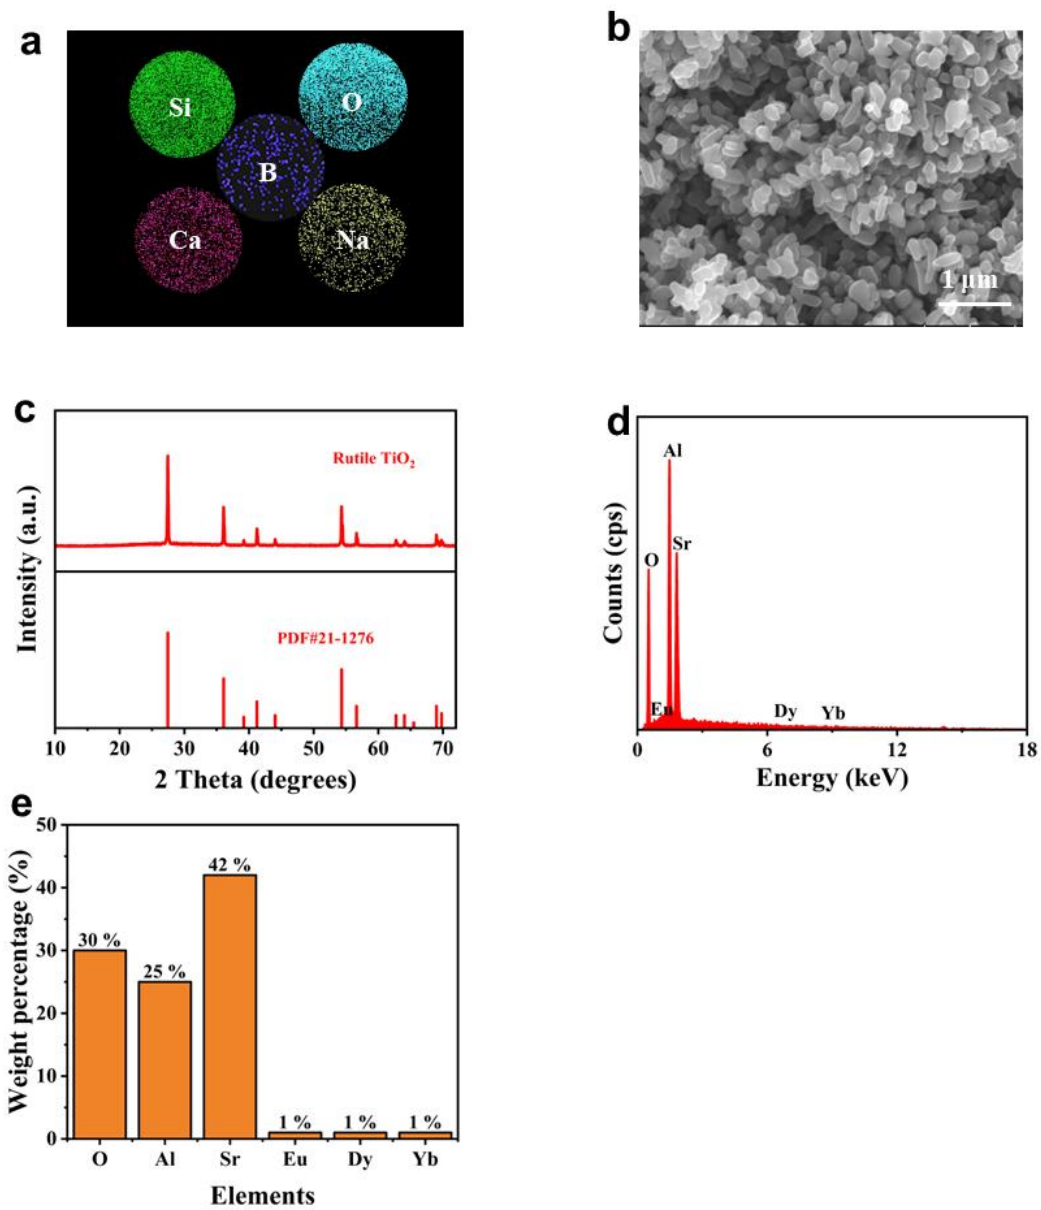

**Fig. S2** Microstructures and chemical properties of materials. (a) The EDS elemental mappings of Si, O, Na, Ca and B in HGMs. (b) The SEM images of TiO<sub>2</sub> nanoparticles. (c) The XRD spectrum of TiO<sub>2</sub> nanoparticles. (d, e) The EDS elemental analysis of REPs.

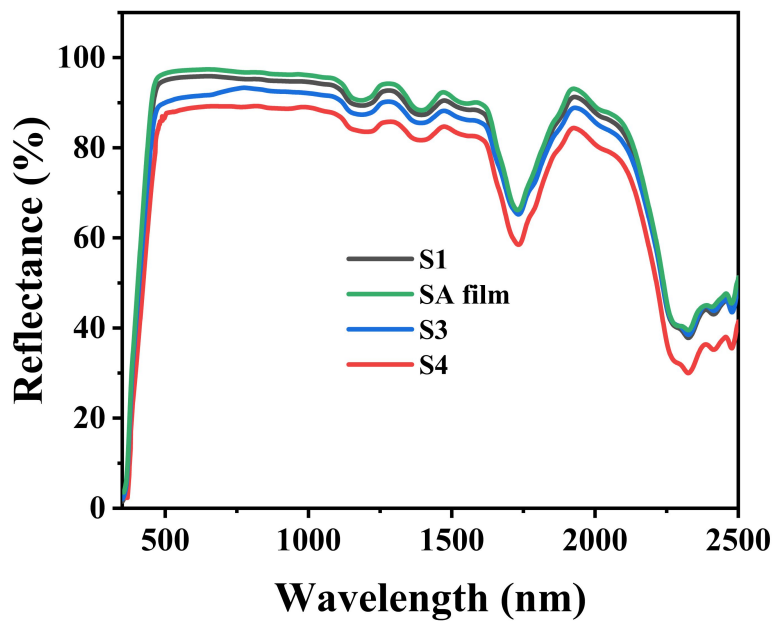

**Fig. S3** The reflectance of composite films with corresponding mass ratio in Table S1.

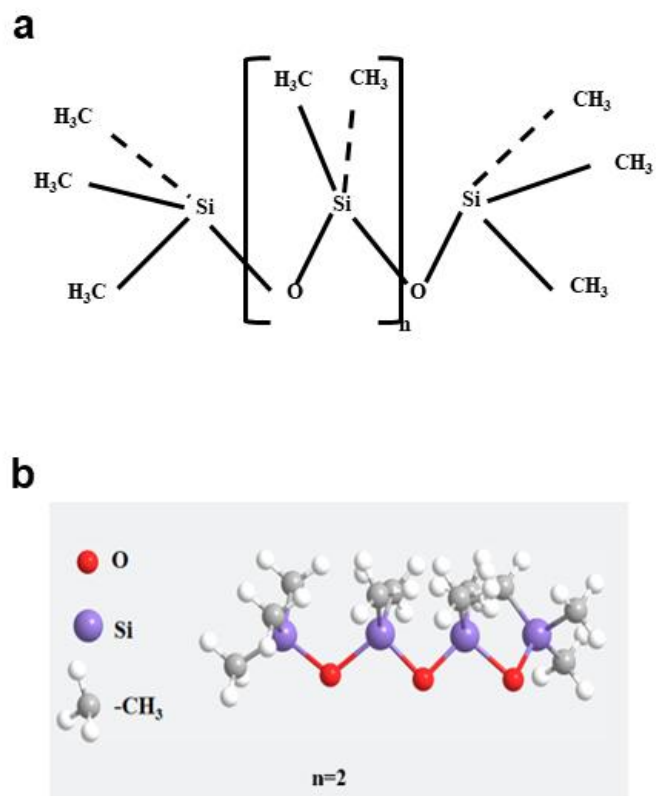

**a**

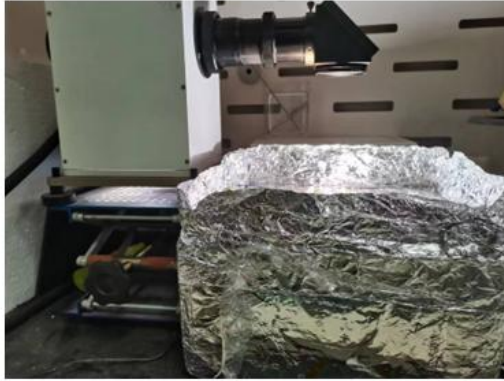

**b**

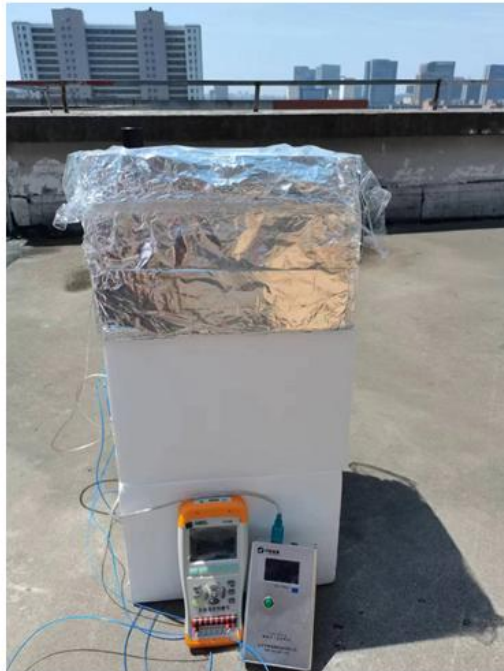

**Fig. S5** The actual indoor and outdoor cooling devices. (a) The actual indoor cooling device. (b) The actual outdoor cooling device.



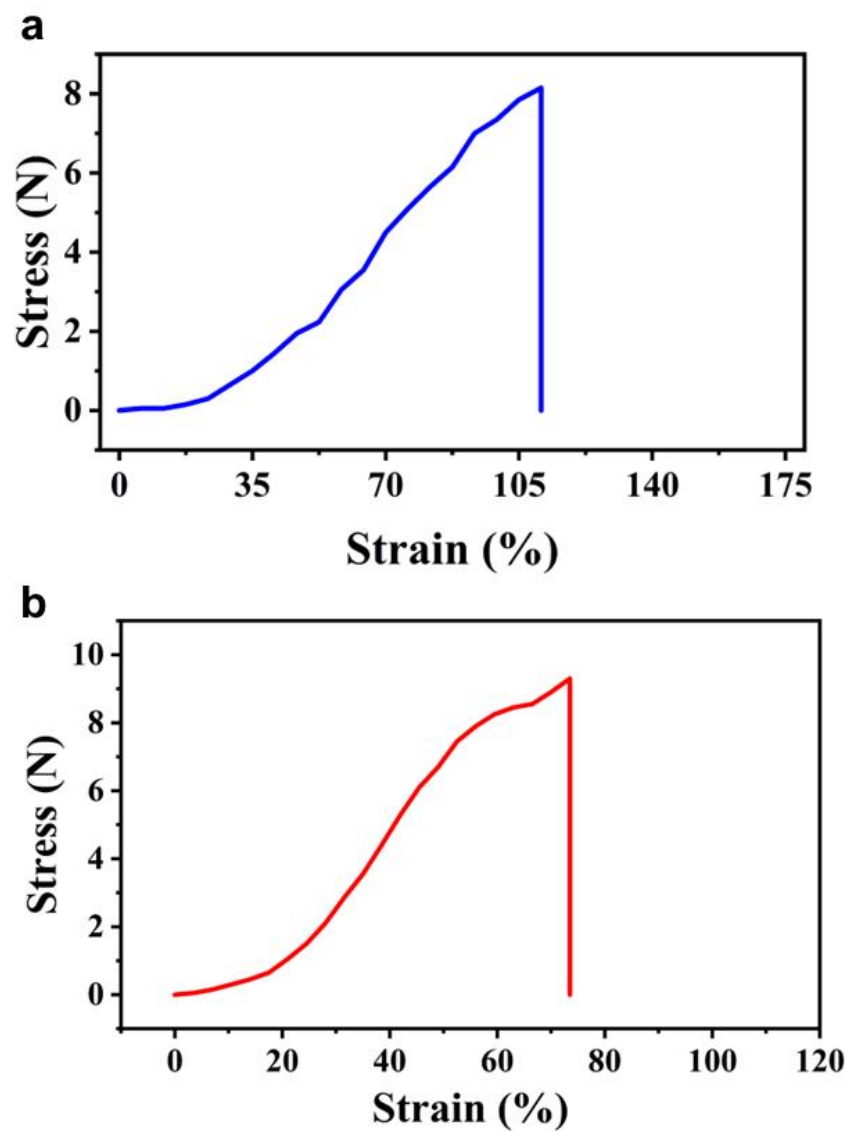

**Fig. S6** Stress-strain curves of SA films of different thicknesses. (a) Stress-strain curve for SA film of 410  $\mu\text{m}$  thickness. (b) Stress-strain curve for SA film of 510  $\mu\text{m}$  thickness.

**Table S1.** The mass ratios of PDMS, TiO<sub>2</sub>, HGMs, and REPs in the our composite film.

| <b>Compositions</b> | <b>PDMS</b> | <b>TiO<sub>2</sub></b> | <b>HGMs</b> | <b>REPs</b> |
|---------------------|-------------|------------------------|-------------|-------------|
| <b>S1</b>           | <b>60 %</b> | <b>26 %</b>            | <b>5 %</b>  | <b>9 %</b>  |
| <b>SA film</b>      | <b>60 %</b> | <b>23 %</b>            | <b>5 %</b>  | <b>12 %</b> |
| <b>S3</b>           | <b>60 %</b> | <b>20 %</b>            | <b>5 %</b>  | <b>15 %</b> |
| <b>S4</b>           | <b>60 %</b> | <b>17 %</b>            | <b>5 %</b>  | <b>18 %</b> |

**Table S2.** The reflectances of the white film and SA film in visible (0.4 to 0.78  $\mu\text{m}$ ;  $\mathbf{R}_{\text{VIS}}$ ) and near shortwave infrared (NSWIR) (0.78 to 2.5  $\mu\text{m}$ ;  $\mathbf{R}_{\text{NSWIR}}$ ), and the broadband solar reflectance (0.3 to 2.5  $\mu\text{m}$ ;  $\mathbf{R}_{\text{solar}}$ ) and the longwave infrared (LWIR) emittance (2.5 to 25  $\mu\text{m}$ ;  $\mathbf{\epsilon}_{\text{LWIR}}$ ), and the selective infrared (IR) emittance (8 to 13  $\mu\text{m}$ ;  $\mathbf{\epsilon}_{\text{IR}}$ ).

| <b>Samples</b>                    | <b>White film</b> | <b>SA film</b> |
|-----------------------------------|-------------------|----------------|
| $\mathbf{R}_{\text{VIS}}$         | 0.903             | 0.938          |
| $\mathbf{R}_{\text{NSWIR}}$       | 0.894             | 0.911          |
| $\mathbf{R}_{\text{solar}}$       | 0.881             | 0.903          |
| $\mathbf{\epsilon}_{\text{LWIR}}$ | 0.945             | 0.953          |
| $\mathbf{\epsilon}_{\text{IR}}$   | 0.950             | 0.955          |

**Table S3.** The comparison of cooling performance with other reported results involves **reflectance** (0.3 to 2.5  $\mu\text{m}$ ), **emittance** (2.5 to 25  $\mu\text{m}$ ), and the temperature differences between the ambient environment and the radiative coolers ( $\Delta\text{T}$ ).

| <b>Samples</b>                           | <b>Reflectance</b> | <b>Emittance</b> | <b><math>\Delta\text{T}</math> (<math>^{\circ}\text{C}</math>)</b> | <b>Ref.</b>      |
|------------------------------------------|--------------------|------------------|--------------------------------------------------------------------|------------------|
| Fluorescent coatings                     | 0.898              | 0.900            | 7                                                                  | [1]              |
| Polymethyl methacrylate films            | 0.850              | 0.984            | 8.1                                                                | [4]              |
| Shish-kebab superstructure films         | 0.830              | 0.870            | 8.2                                                                | [5]              |
| Cellulose-based fabric                   | 0.917              | 0.900            | 7.5                                                                | [6]              |
| Self-Cleaning polymer composites         | 0.921              | 0.75             | 7.8                                                                | [7]              |
| Scalable-manufactured dual-layer coating | 0.880              | 0.920            | 3.6                                                                | [8]              |
| Double-layer coating                     | 0.90               | 0.90             | /                                                                  | [9]              |
| A tandem radiative/evaporative cooler    | 0.930              | 0.800            | 10                                                                 | [10]             |
| <b>SA film</b>                           | <b>0.903</b>       | <b>0.953</b>     | <b>11.4</b>                                                        | <b>This work</b> |

## REFERENCES

1. X. Xue, M. Qiu, Y. Li, Q. M. Zhang, S. Li, Z. Yang, C. Feng, W. Zhang, J. Dai, D. Lei, W. Jin, L. Xu, T. Zhang, J. Qin, H. Wang and S. Fan, *Adv. Mater.*, 2020, **32**, 1906751.
2. J. Li, Y. Fu, J. Zhou, K. Yao, X. Ma, S. Gao, Z. Wang, J.-G. Dai, D. Lei and X. Yu, *Sci. Adv.*, 2023, **9**, eadg1837.
3. M. Yang, H. Zhong, T. Li, B. Wu, Z. Wang and D. Sun, *ACS Nano*, 2023, **17**, 1693–1700.
4. G. Qi, X. Tan, Y. Tu, X. Yang, Y. Qiao, Y. Wang, J. Geng, S. Yao and X. Chen, *ACS Appl. Mater. Interfaces*, 2022, **14**, 31277–31284.
5. X. Liu, Y. Li, Y. Pan, Z. Zhou, Z. Zhai, C. Liu and C. Shen, *ACS Appl. Mater. Interfaces*, 2023, **15**, 17188-17194.
6. Y. Zhang, W. Zhu, C. Zhang, J. Peoples, X. Li, A. L. Felicelli, X. Shan, D. M. Warsinger, T. Borca-Tasciuc, X. Ruan and T. Li, *Nano Lett.*, 2022, **22**, 2618–2626.
7. K. Zhou, X. Yan, S. J. Oh, G. Padilla-Rivera, H. A. Kim, D. M. Cropek, N. Miljkovic and L. Cai, *Nano Lett.*, 2023, **23**, 3669–3677.
8. S. Wang, Y. Wang, Y. Zou, G. Chen, J. Ouyang, D. Jia and Y. Zhou, *ACS Appl. Mater. Interfaces*, 2021, **13**, 21888–21897.
9. Z. Huang and X. Ruan, *International Journal of Heat and Mass Transfer*, 2017, **104**, 890–896.
10. J. Li, X. Wang, D. Liang, N. Xu, B. Zhu, W. Li, P. Yao, Y. Jiang, X. Min, Z. Huang, S. Zhu, S. Fan and J. Zhu, *Sci. Adv.*, 2022, **8**, eabq0411.
